# Supplementary material
Source: PubMed Central journal article supplement (PMC7008310)
Supplement: tpmd190147.SD1.pdf [file tpmd190147.SD1.pdf]

## *Supplementary Information*

### **Results**

#### **LRV-1 Prevalence by Demographics: Secondary Outcomes**

Nineteen (29%) isolates from males were positive for LRV-1 versus 2 (15%) from females ( $p=0.50$ ) (Table 2). Median age of patients whose isolates were LRV-1 positive and caused LCL, inflammatory/multifocal CL, and ML/MCL were: 33 years (range 23 - 57 years), 28 years (range 22 - 68 years), and 28 years (range 20-59 years), respectively ( $p=0.72$ ) (Table 2). LRV-1 positivity was not associated with median age, whereby patients whose isolates were LRV-1 positive had a median age of 29 years (range 20 - 68 years) compared to LRV-1 negative patients whose median age was 35.5 years (range 2 - 82 years) ( $p=0.55$ ) (Table 2).

**Tables**

**Supplementary Table 1: Demographic and clinical metrics of ATL patients with *L. (V.) braziliensis* isolates acquired in Peru**

| <b>Specimen</b> | <b>Age</b> | <b>Sex</b> | <b>Specimen Type</b> | <b>LRV-1 Status</b> | <b>Relative LRV-1 Copy Number</b> | <b>Clinical Phenotype</b> |
|-----------------|------------|------------|----------------------|---------------------|-----------------------------------|---------------------------|
| 1               | 28         | M          | FPLI                 | Positive            | 35.68                             | ML                        |
| 2               | 31         | M          | FPLI                 | Negative            |                                   | LCL                       |
| 3               | 20         | M          | FPLI                 | Positive            | 0.35                              | MCL                       |
| 4               | 28         | M          | Biopsy               | Positive            | $2.9 \times 10^{-3}$              | Inflammatory CL           |
| 5               | 50         | M          | Biopsy               | Negative            |                                   | Inflammatory CL           |
| 6               | 20         | M          | Biopsy               | Negative            |                                   | Inflammatory CL           |
| 7               | 34         | M          | Biopsy               | Negative            |                                   | Multifocal CL             |
| 8               | 22         | M          | Cytology<br>Brush    | Negative            |                                   | Inflammatory CL           |
| 9               | 38         | M          | Cytology<br>Brush    | Negative            |                                   | ML                        |
| 10              | 54         | M          | Cytology             | Negative            |                                   | ML                        |

|    |    |   |                   |          |     |     |
|----|----|---|-------------------|----------|-----|-----|
|    |    |   | Brush             |          |     |     |
| 11 | 65 | M | Cytology<br>Brush | Negative |     | ML  |
| 12 | 20 | M | Cytology<br>Brush | Negative |     | LCL |
| 13 | 30 | M | Cytology<br>Brush | Positive | 4.7 | ML  |
| 14 | 31 | M | Cytology<br>Brush | Negative |     | LCL |
| 15 | 29 | M | Cytology<br>Brush | Positive | 7.2 | LCL |
| 16 | 40 | M | Cytology<br>Brush | Negative |     | MCL |
| 17 | 49 | M | Cytology<br>Brush | Negative |     | ML  |
| 18 | 27 | M | Cytology          | Negative |     | LCL |

|    |    |   |                   |          |      |     |
|----|----|---|-------------------|----------|------|-----|
|    |    |   | Brush             |          |      |     |
| 19 | 31 | M | Cytology<br>Brush | Negative |      | LCL |
| 20 | 46 | M | Cytology<br>Brush | Negative |      | LCL |
| 21 | 53 | M | Cytology<br>Brush | Positive | N/A* | LCL |
| 22 | 36 | F | Cytology<br>Brush | Positive | 7.7  | LCL |
| 23 | 51 | M | Cytology<br>Brush | Negative |      | MCL |
| 24 | 44 | M | Cytology<br>Brush | Negative |      | LCL |
| 25 | 82 | M | Cytology<br>Brush | Negative |      | ML  |
| 26 | 41 | M | Cytology          | Negative |      | MCL |

|    |    |   |                   |          |                      |                 |
|----|----|---|-------------------|----------|----------------------|-----------------|
|    |    |   | Brush             |          |                      |                 |
| 27 | 33 | M | Cytology<br>Brush | Positive | 7.5                  | LCL             |
| 28 | 27 | M | Cytology<br>Brush | Negative |                      | LCL             |
| 29 | 22 | M | Culture           | Positive | 0.1                  | Inflammatory CL |
| 30 | 57 | F | FPLI              | Positive | $9.5 \times 10^{-2}$ | Multifocal CL   |
| 31 | 53 | F | Culture           | Negative |                      | Multifocal CL   |
| 32 | 53 | M | Culture           | Positive | 6.53                 | ML              |
| 33 | NA | F | Culture           | Negative |                      | Inflammatory CL |
| 34 | 27 | M | Culture           | Negative |                      | Inflammatory CL |
| 35 | 25 | M | Culture           | Negative |                      | Inflammatory CL |
| 36 | 35 | M | Culture           | Negative |                      | MCL             |
| 37 | 45 | M | Culture           | Negative |                      | Inflammatory CL |
| 38 | 68 | M | Culture           | Negative |                      | MCL             |
| 39 | 14 | F | Culture           | Negative |                      | Inflammatory CL |

|    |    |   |         |          |                      |                 |
|----|----|---|---------|----------|----------------------|-----------------|
| 40 | 57 | M | Culture | Positive | 27.2                 | LCL             |
| 41 | 35 | F | Culture | Negative |                      | Inflammatory CL |
| 42 | 20 | M | Culture | Positive | 103.5                | MCL             |
| 43 | 24 | M | Culture | Positive | $2.8 \times 10^{-1}$ | MCL             |
| 44 | 2  | M | Culture | Negative |                      | LCL             |
| 45 | 24 | M | Culture | Positive | $2.0 \times 10^{-2}$ | Inflammatory CL |
| 46 | 20 | M | Culture | Negative |                      | LCL             |
| 47 | 13 | M | Culture | Negative |                      | Multifocal CL   |
| 48 | 68 | F | Culture | Negative |                      | Multifocal CL   |
| 49 | 53 | M | Culture | Negative |                      | Inflammatory CL |
| 50 | 10 | M | Culture | Negative |                      | Inflammatory CL |
| 51 | 76 | F | Culture | Negative |                      | LCL             |
| 52 | 12 | F | Culture | Negative |                      | LCL             |
| 53 | 23 | M | Culture | Positive | $9.9 \times 10^{-3}$ | LCL             |
| 54 | 39 | M | Culture | Negative |                      | LCL             |
| 55 | 60 | F | Culture | Negative |                      | LCL             |

|    |    |   |         |          |                      |                 |
|----|----|---|---------|----------|----------------------|-----------------|
| 56 | 50 | M | Culture | Negative |                      | LCL             |
| 57 | 17 | F | Culture | Negative |                      | Multifocal CL   |
| 58 | 47 | M | Culture | Negative |                      | LCL             |
| 59 | 27 | M | Culture | Positive | N/A*                 | ML              |
| 60 | 31 | M | Culture | Negative |                      | LCL             |
| 61 | 45 | M | Culture | Negative |                      | ML              |
| 62 | 26 | M | Culture | Positive | $8.5 \times 10^{-3}$ | LCL             |
| 63 | 35 | M | Culture | Positive | $9.1 \times 10^{-2}$ | ML              |
| 64 | 29 | M | Culture | Negative |                      | LCL             |
| 65 | 25 | M | Culture | Negative |                      | LCL             |
| 66 | 15 | M | Culture | Negative |                      | LCL             |
| 67 | 59 | M | Culture | Positive | N/A*                 | ML              |
| 68 | 32 | M | Culture | Negative |                      | LCL             |
| 69 | 36 | M | Culture | Negative |                      | ML              |
| 70 | 12 | F | Culture | Negative |                      | LCL             |
| 71 | 70 | M | Culture | Negative |                      | Inflammatory CL |

|    |    |   |         |          |      |                 |
|----|----|---|---------|----------|------|-----------------|
| 72 | 38 | M | Culture | Negative |      | LCL             |
| 73 | 26 | M | Culture | Negative |      | Inflammatory CL |
| 74 | 34 | M | Culture | Negative |      | Inflammatory CL |
| 75 | 68 | M | Culture | Negative |      | Inflammatory CL |
| 76 | 68 | M | Culture | Negative |      | ML              |
| 77 | 58 | F | Culture | Negative |      | Inflammatory CL |
| 78 | 68 | M | Culture | Positive | N/A* | Multifocal CL   |

\*N/A: LRV-1 relative copy number could not be calculated as the reference gene kmp11 was not amplifiable
